# Supplementary material for: Nano-flower S-scheme heterojunction NiAl-LDH/MoS2 for enhancing photocatalytic hydrogen production
Source: Royal Society of Chemistry journal article supplement (doi:10.1039/d1nj04728k), 2021-12-02
Supplement: d1nj04728k1.pdf [file d1nj04728k1.pdf]

## Supplementary Information

### **Nano-flower S-scheme heterojunction NiAl-LDH/MoS<sub>2</sub> for enhance photocatalytic hydrogen production**

Xinyu Liu<sup>1</sup>, Jing Xu<sup>\*1,2,3</sup>, Lijun Ma<sup>1</sup>, Ye Liu<sup>1</sup>, Linying Hu<sup>1</sup>

<sup>1</sup> School of Chemistry and Chemical Engineering, North Minzu University, Yinchuan 750021, PR China

<sup>2</sup> Key Laboratory of Chemical Engineering and Technology (North Minzu University), State Ethnic Affairs Commission, Yinchuan 750021, PR China

<sup>3</sup> Ningxia Key Laboratory of Solar Chemical Conversion Technology Autonomous Region, North Minzu University, Yinchuan 750021, PR China

#### **1. Detail of material characterization and performance measurements**

##### **1.1 Material characterization**

The crystal structure characteristics of the samples were obtained by X-ray diffraction (XRD). Field emission scanning electron microscopy (SEM) was used to obtain the morphological characteristics of the samples. In order to investigate the elemental composition and valence state of the samples, the X-ray spectrometer (XPS, ESCALAB) was used to detect them. The specific surface area ( $S_{\text{BET}}$ ) and pore size of the sample were obtained by N<sub>2</sub> adsorption–desorption instrument (ASAP 2020 M) test. In order to explore the response degree of the samples to visible light, the samples were detected by ultraviolet spectrophotometer (Lambda 750 S). The samples Photoluminescence (PL) spectra was obtained by spectrophotometer (Fluoromax-4). Photochemical measurements were made in a three-electrode system using the CHI 660D (electrochemical workstation). Preparation of working electrode: ITO (conductive glass, 1×2 cm<sup>2</sup>) was cleaned with dilute hydrochloric acid solution. Then, under the action of ultrasound, the conductive glass sheets were immersed in diluted sodium hydroxide solution, acetone solution, ethanol and distilled water respectively for about 30min. The catalyst was added to the anhydrous ethanol, which was dispersed by ultrasound to form a suspension. Then, the suspension was uniformly dropped on the treated conductive glass sheet with pipetting gun, and the smear area was controlled at 1×1cm<sup>2</sup>. The electrode coated with catalyst was dried under natural conditions to obtain the working electrode. The Pt electrode was used as the counter electrode, the saturated calomel electrode (SCE) was used as the reference electrode. A 300-watt xenon lamp ( $\lambda \geq 420\text{nm}$ ) was used as the incident light source, and Na<sub>2</sub>SO<sub>4</sub> solution (0.2 mol/ L) was used as the electrolyte.

##### **1.2 Hydrogen production condition**

The photocatalytic production hydrogen was carried out in an airtight quartz bottle, which

could be degassed and sampled. Usually, 10mg of catalytic material, 20mg of Eosin Y (EY), and 30 mL of TEOA solution containing 10% were weighed and added into a quartz flask. Before the solution was illuminated by visible light, the reactant system was degassed by vacuuming to remove excess gas from the solution. The amount of hydrogen evolution was analyzed by online gas chromatograph (SP 2100, N<sub>2</sub> as carrier).

Under the same reaction conditions and reaction time, apparent quantum efficiency (AQE) experiments were performed using different narrow-band filters. The number of hydrogen evolution of the system at 420 nm, 450 nm, 475 nm, 500 nm, and 520 nm was measured, and AQE in the corresponding band was obtained according to formula [1, 2].

$$AQE = [2 \times \text{number of H}_2 \text{ molecules evolved in 1h} / \text{number of incident photons in 1h}] \times 100$$

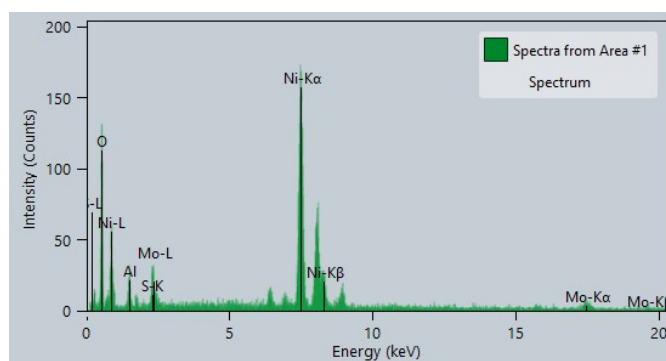

S1. EDX spectrum of NM3

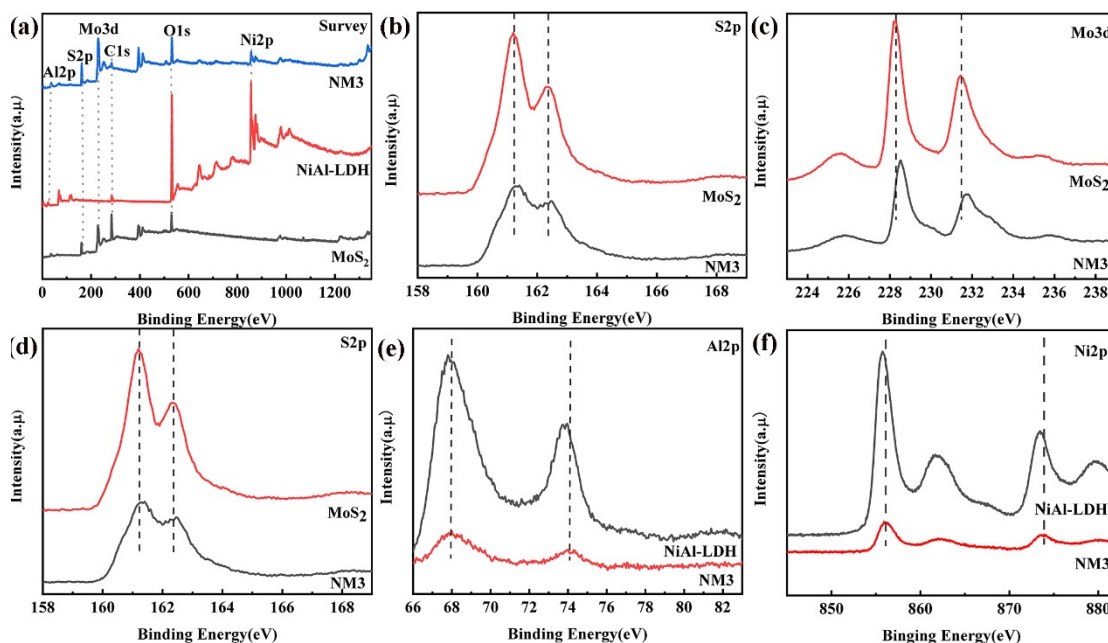

S2. electron transfer contrast

**Table 1.** Comparison of the H<sub>2</sub> production activity of NiAl-LDH/MoS<sub>2</sub> photocatalyst and the recently reported photocatalyst.

| Photocatalyst                                                             | Catalyst dosage(mg) | Scavenger                                              | Light source               | H <sub>2</sub> evolution rate (μmol g <sup>-1</sup> h <sup>-1</sup> ) | Ref       |
|---------------------------------------------------------------------------|---------------------|--------------------------------------------------------|----------------------------|-----------------------------------------------------------------------|-----------|
| NiAl-LDH/MoS <sub>2</sub>                                                 | 10                  | 10% TEOA                                               | 5 W LED                    | 4590                                                                  | This work |
| MoS <sub>2</sub> /RGO/CaTiO <sub>3</sub>                                  | 10                  | 25% lactic acid                                        | sunlight                   | 808                                                                   | [3]       |
| ZnO-MoS <sub>2</sub> -RGO                                                 | 5                   | 0.1M Na <sub>2</sub> S/Na <sub>2</sub> SO <sub>3</sub> | sunlight                   | 28.616                                                                | [4]       |
| ZnO-MoS <sub>2</sub> -PANI                                                | 10                  | 0.3M Na <sub>2</sub> S/Na <sub>2</sub> SO <sub>4</sub> | sunlight                   | 29.57                                                                 | [5]       |
| N-ZnO and MoS <sub>2</sub>                                                | 10                  | 0.3M Na <sub>2</sub> S/Na <sub>2</sub> SO <sub>4</sub> | sunlight                   | 17.363                                                                | [6]       |
| P-LDH/CN                                                                  | 30                  | 10%TEOA                                                | 300 W xenon                | 1678.6                                                                | [7]       |
| Mn <sub>0.05</sub> Cd <sub>0.95</sub> S/NiAl-LDH                          | 15                  | 0.3M Na <sub>2</sub> S/Na <sub>2</sub> SO <sub>3</sub> | 5 W LED                    | 7500                                                                  | [8]       |
| g-C <sub>n</sub> H <sub>2n-2</sub> /NiAl-LDH                              | 10                  | 10% TEOA                                               | 5 W LED                    | 649                                                                   | [9]       |
| NiAl-LDH/g-C <sub>3</sub> N <sub>4</sub> /Ag <sub>3</sub> PO <sub>4</sub> | 50                  | 10% methanol                                           | 250W tungsten halogen lamp | 4330                                                                  | [10]      |

## References

- [1] A. Kumar, A. Kumar, V. Krishnan, Perovskite Oxide Based Materials for Energy and Environment-Oriented Photocatalysis, *Acs Catalysis* 10(17) (2020) 10253-10315.
- [2] A. Kumar, V. Krishnan, Vacancy Engineering in Semiconductor Photocatalysts: Implications in Hydrogen Evolution and Nitrogen Fixation Applications, *Advanced Functional Materials* 31(28) (2021).
- [3] A. Kumar, V.N. Rao, A. Kumar, M.V. Shankar, V. Krishnan, Interplay between Mesocrystals of CaTiO<sub>3</sub> and Edge Sulfur Atom Enriched MoS<sub>2</sub> on Reduced Graphene Oxide Nanosheets: Enhanced Photocatalytic Performance under Sunlight Irradiation, *Chemphotochem* 4(6) (2020) 427-444.

[4] S. Kumar, N.L. Reddy, H.S. Kushwaha, A. Kumar, M.V. Shankar, K. Bhattacharyya, A. Halder, V. Krishnan, Efficient Electron Transfer across a ZnO-MoS<sub>2</sub>-Reduced Graphene Oxide Heterojunction for Enhanced Sunlight-Driven Photocatalytic Hydrogen Evolution, *Chemsuschem* 10(18) (2017) 3588-3603.

[5] V. Sharma, V. Maivizhikannan, V.N. Rao, S. Kumar, A. Kumar, A. Kumar, M.V. Shankar, V. Krishnan, Sea urchin shaped ZnO coupled with MoS<sub>2</sub> and polyaniline as highly efficient photocatalysts for organic pollutant decomposition and hydrogen evolution, *Ceramics International* 47(7) (2021) 10301-10313.

[6] S. Kumar, A. Kumar, V.N. Rao, A. Kumar, M.V. Shankar, V. Krishnan, Defect-Rich MoS<sub>2</sub> Ultrathin Nanosheets-Coated Nitrogen-Doped ZnO Nanorod Heterostructures: An Insight into in-Situ-Generated ZnS for Enhanced Photocatalytic Hydrogen Evolution, *Acs Applied Energy Materials* 2(8) (2019) 5622-5634.

[7] J.-Y. He, D. Zhang, X.-J. Wang, J. Zhao, Y.-P. Li, Y. Liu, F.-T. Li, Phosphorylation of NiAl-layered double hydroxide nanosheets as a novel cocatalyst for photocatalytic hydrogen evolution, *International Journal of Hydrogen Energy* 46(36) (2021) 18977-18987.

[8] Y. Wang, X. Hao, G. Wang, Z. Jin, Rational Design of a Core-Shell-Shaped Flowerlike Mn<sub>0.05</sub>Cd<sub>0.95</sub>S@NiAl-LDH Structure for Efficient Hydrogen Evolution, *Catalysis Letters* 151(3) (2021) 634-647.

[9] Z.-L. Jin, Y.-P. Wang, Strategy of Graphdiyne (g-C<sub>3</sub>N<sub>4</sub>) Preparation Coupling with the Flower-Like NiAl-LDH Heterojunctions for Efficient Photocatalytic Hydrogen Evolution\*, *Chemistry (Weinheim an der Bergstrasse, Germany)* 27(49) (2021) 12649-12658.

[10] S. Megala, P. Ravi, P. Maadeswaran, M. Navaneethan, M. Sathish, R. Ramesh, The construction of a dual direct Z-scheme NiAl LDH/g-C<sub>3</sub>N<sub>4</sub>/Ag<sub>3</sub>PO<sub>4</sub> nanocomposite for enhanced photocatalytic oxygen and hydrogen evolution, *Nanoscale Advances* 3(7) (2021) 2075-2088.
